# Supplementary material for: Electrochemical Trimethylamine N-Oxide Biosensor with Enzyme-Based Oxygen-Scavenging Membrane for Long-Term Operation under Ambient Air
Source: MDPI journal article supplement (doi:10.3390/bios11040098), 2021-03-27
Supplement: s1 [file s1]

Supplementary materials

# Electrochemical Trimethylamine *N*-Oxide Biosensor with Enzyme-Based Oxygen-Scavenging Membrane for Long-Term Operation under Ambient Air

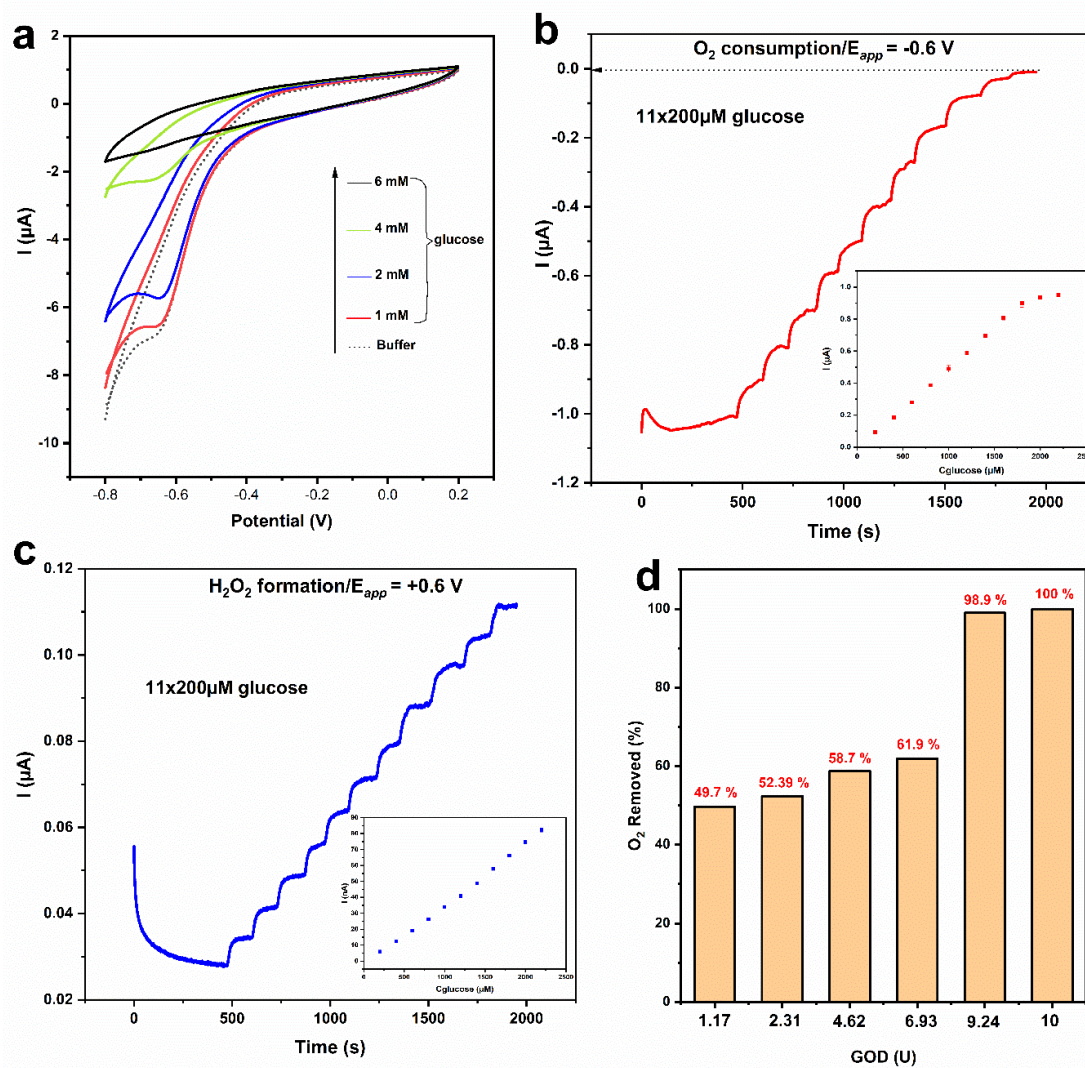

**Figure S1. Glucose oxidase reaction on Clark electrode.** Cyclic voltammetric measurements of an electrode covered with GOD immobilized in PVA (3%) with serial addition of glucose (0–6 mM) (a). Amperometric detection of the oxygen consumption at  $-0.6$  V (b) and hydrogen peroxide production at  $+0.6$  V (c) upon addition of glucose with a membrane including GOD entrapped in 3% PVA hydrogel. (d) Optimization of the GOD present in the oxygen scavenging membrane in order to get a stable anoxic condition. All these measurements were performed in Sørensen phosphate buffer (pH 7) containing 100 mM KCl under ambient air conditions.

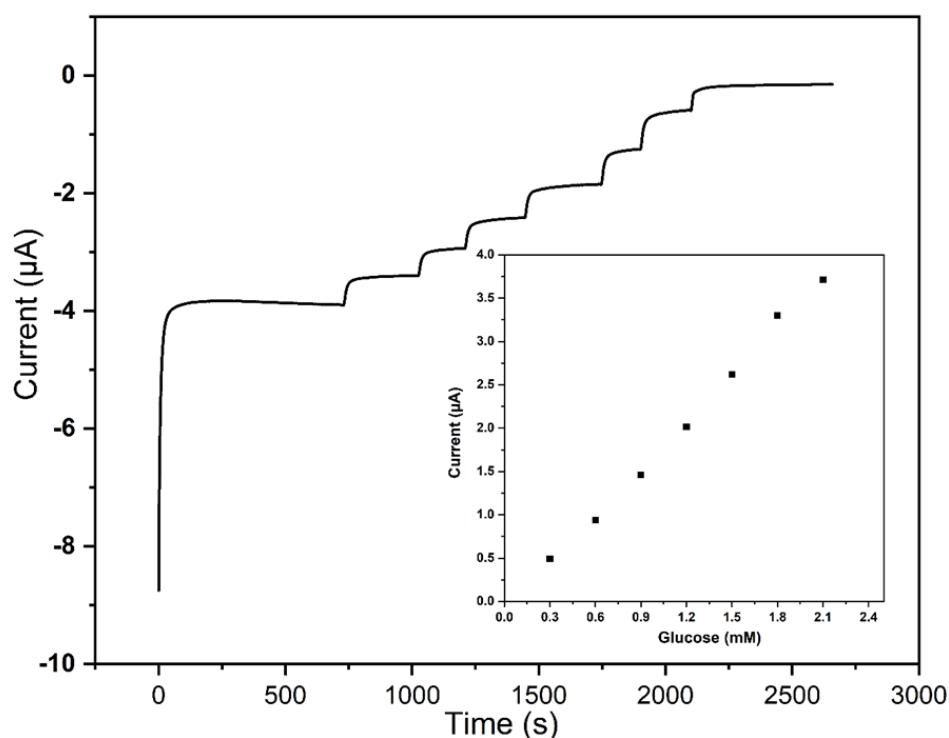

**Figure S2.** Current trace of a modified glassy carbon electrode on serial addition of 0.3 mM glucose. The inset represents the current change vs glucose concentration. Measurements were performed in Sørensen buffer pH 7; aerobic condition. The oxygen shield consisting of GOD 10 U, Cat 1000 U, PVA 3% was immobilized on glassy carbon electrode. Applied potential  $E_{app} = -0.8V$  vs Ag/AgCl, 1M KCl.

**Table S1.** Comparison of TMAO-sensors.

| Technique                  | Electrode | Linear range | LOD *                           | Sensitivity | Stability | Response time |
|----------------------------|-----------|--------------|---------------------------------|-------------|-----------|---------------|
| Amperometry [17]           | GCE       | 2-110µM      | 2,96 nM (buffer / spiked serum) | 14.16 nA/µM | 1 week    | 16 ± 2 s      |
| DPV [16]                   | MIP/ITO   | 13-200 µM    | 20 µM                           | nr          | nr        | 16 min        |
| Amperometry (present work) | GCE       | 2-15000 µM   | 0.4 µM (buffer)                 | 2.75 nA/µM  | 3 weeks   | 33 ± 5s       |

\*calculated from  $3 \times SD$  of the blank, or small TMAO concentration, resp., GC: glassy carbon electrode, MIP: molecular imprinted polymer, ITO: indium doped tin oxide; nr: not reported, DPV: differential pulse voltammetry.
